# Supplementary material for: Regulation of Nrf2 by X Box-Binding Protein 1 in Retinal Pigment Epithelium
Source: PubMed Central journal article supplement (PMC6306429; doi:10.3389/fgene.2018.00658), 2018-12-20
Supplement: Image_1.pdf [file Image_1.pdf]

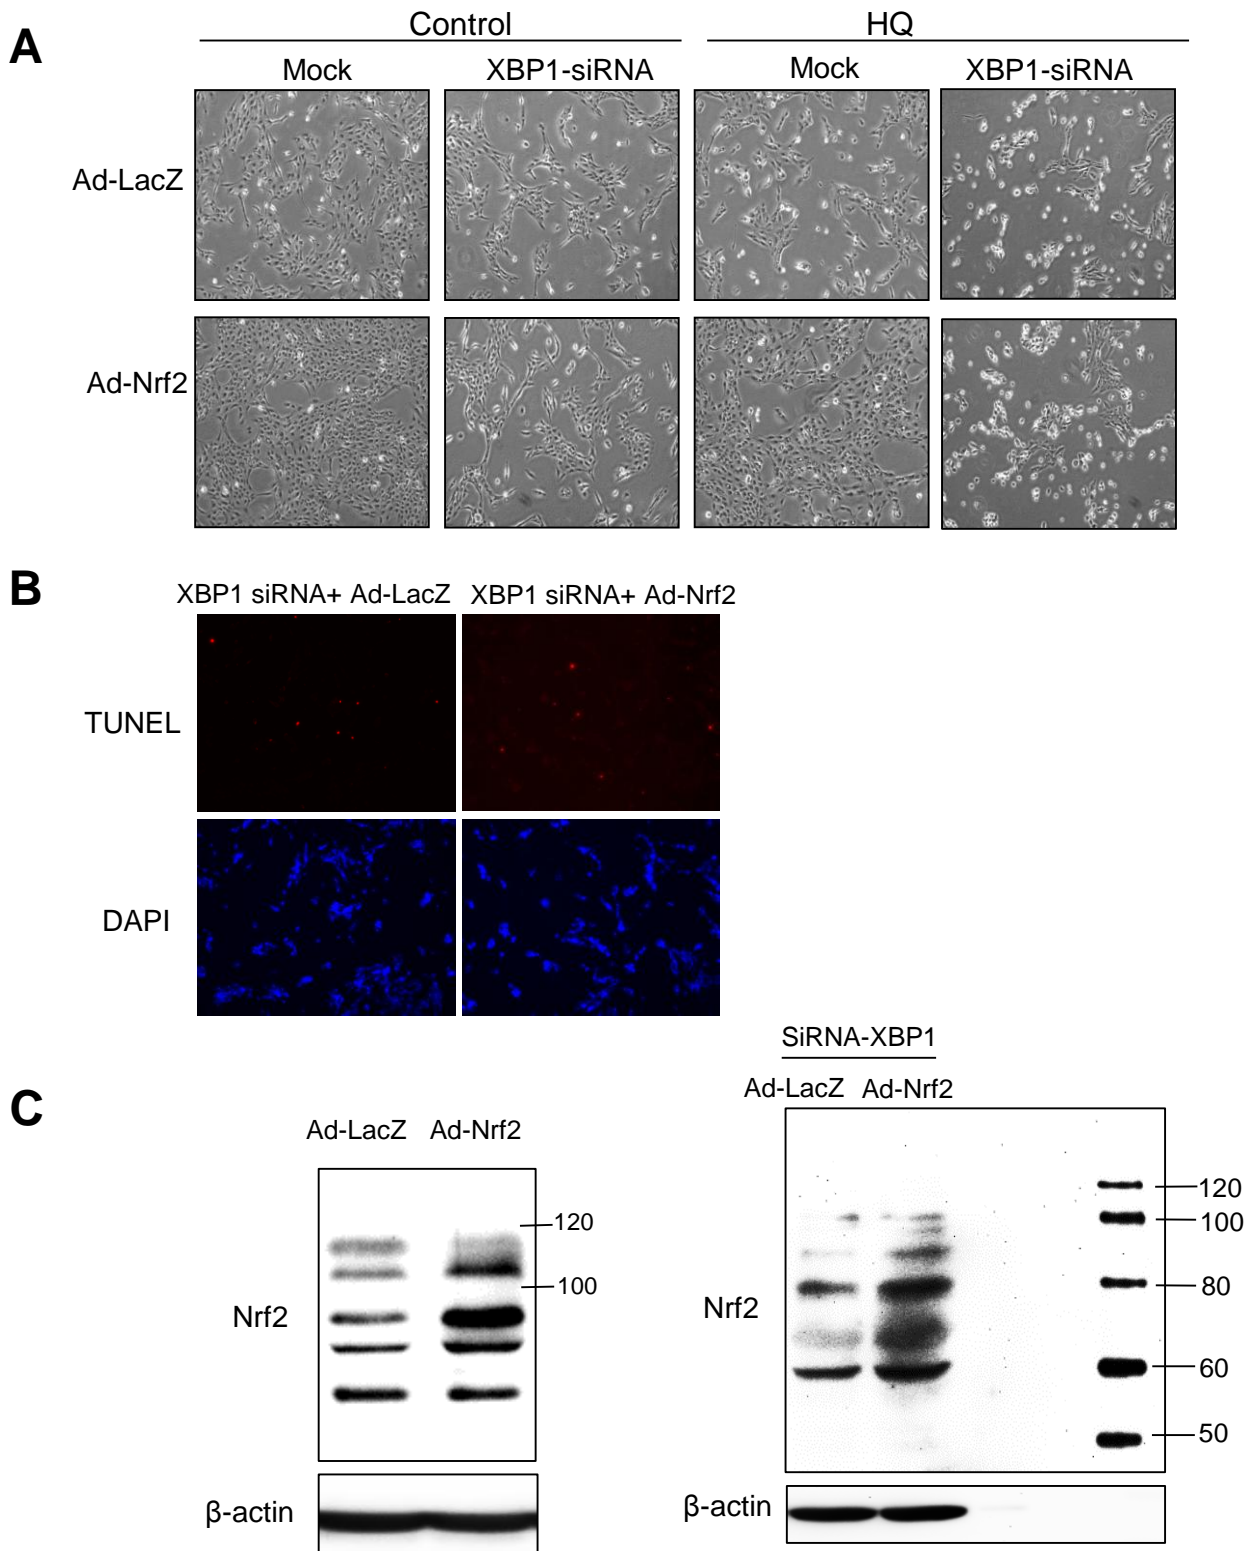

**Supplementary Figure 1. Loss of XBP1 exacerbated hydroquinone induced cell death in ARPE-19 cells, and overexpression of *Nrf2* exhibited no rescue.** ARPE-19 cells were transfected with *XBP1* siRNA or lipofectamine only (Mock) as control for 24 h, then infected with adenovirus overexpressing *Nrf2* or *LacZ* as control for another 24 h. Then cells were treated with hydroquinone (100  $\mu$ M, 24 h), and cell death and DNA damage was detected by phase contrast microscopy (A) and TUNEL assay (B), respectively. The level of *Nrf2* expression was detected by Western Blot (C).
